# Supplementary material for: Bioactive Alkaloids from the Marine-Derived Fungus Metarhizium sp. P2100
Source: MDPI journal article supplement (doi:10.3390/jof8111218), 2022-11-17
Supplement: s1 [file s1]

# Bioactive alkaloids from the marine-derived fungus *Metarhizium* sp. P2100

Guang-Shan<sup>1#</sup> Yao, Zhong-Lian Ma<sup>2,3,4#</sup>, Yao-Yao Zheng<sup>2,3,4#</sup>, Ling Lv<sup>2,3,4</sup>, Jun-Qiu Mao<sup>2,3,4</sup>, Chang-Yun Wang<sup>2,3,4\*</sup>

<sup>1</sup> Fujian Key Laboratory on Conservation and Sustainable Utilization of Marine Biodiversity, Institute of Oceanography, Minjiang University, Fuzhou 350108, China

<sup>2</sup> Key Laboratory of Marine Drugs, the Ministry of Education of China, School of Medicine and Pharmacy, Ocean University of China, Qingdao 266003, China

<sup>3</sup> Laboratory for Marine Drugs and Bioproducts, Qingdao National Laboratory for Marine Science and Technology, Qingdao 266237, China

<sup>4</sup> Institute of Evolution & Marine Biodiversity, Ocean University of China, Qingdao 266003, China

\* Correspondence: changyun@ouc.edu.cn (C.-Y.W.); Tel.: +86-0532-8203-1536 (C.-Y.W.)

# These three authors contributed equally to this work

## List of Supplementary Material

**Figure S1.**  $^1\text{H}$  NMR (400 MHz,  $\text{DMSO-}d_6$ ) spectrum of **1**

**Figure S2.**  $^{13}\text{C}$  NMR (100 MHz,  $\text{DMSO-}d_6$ ) spectrum of **1**

**Figure S3.** HSQC ( $\text{DMSO-}d_6$ ) spectrum of **1**

**Figure S4.**  $^1\text{H}$ - $^1\text{H}$  COSY ( $\text{DMSO-}d_6$ ) spectrum of **1**

**Figure S5.** HMBC ( $\text{DMSO-}d_6$ ) spectrum of **1**

**Figure S6.** NOESY ( $\text{DMSO-}d_6$ ) spectrum of **1**

**Figure S7.** HRESIMS spectrum of **1**

**Figure S8.** IR spectrum of **1**

**Figure S9.** CD spectrum of **1**

**Table S1.** The antibacterial activity results (only sections are shown)

**Table S2.** The anti-inflammatory activity results (only sections are shown)

**Table S3.** The anti-tumor activity results (only sections are shown)

**The rDNA-ITS sequence of the fungal strain *Metarhizium* sp. P2100**

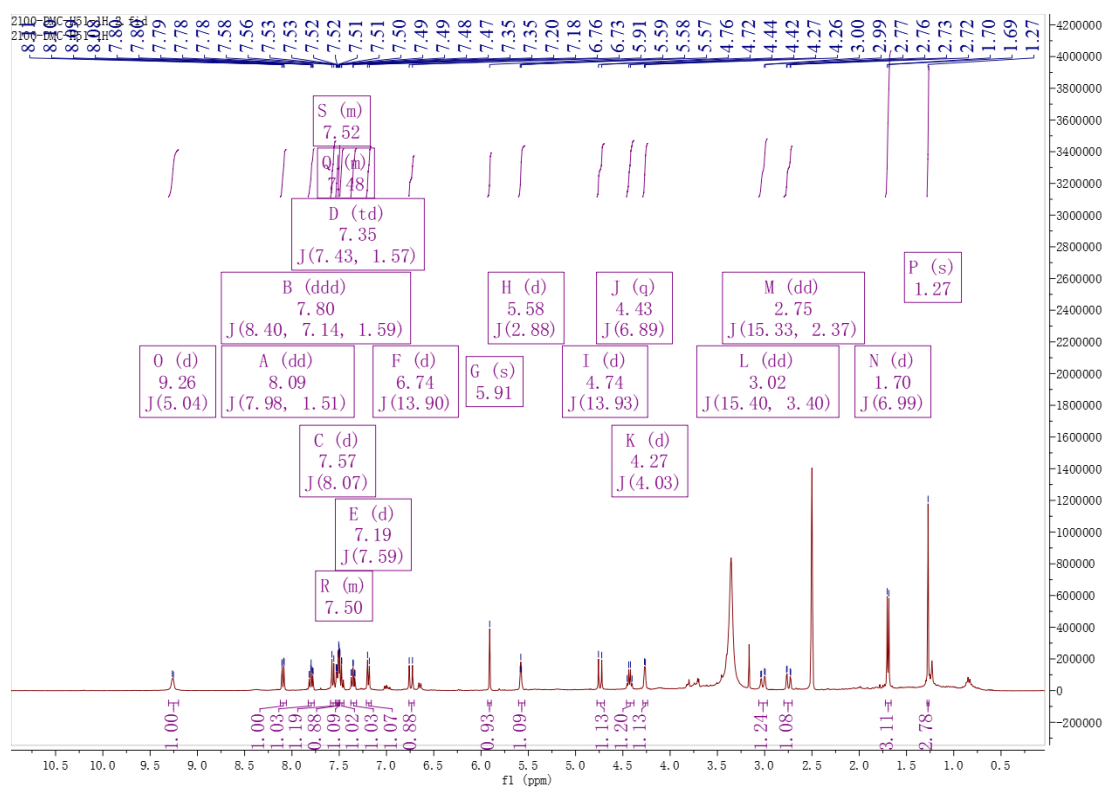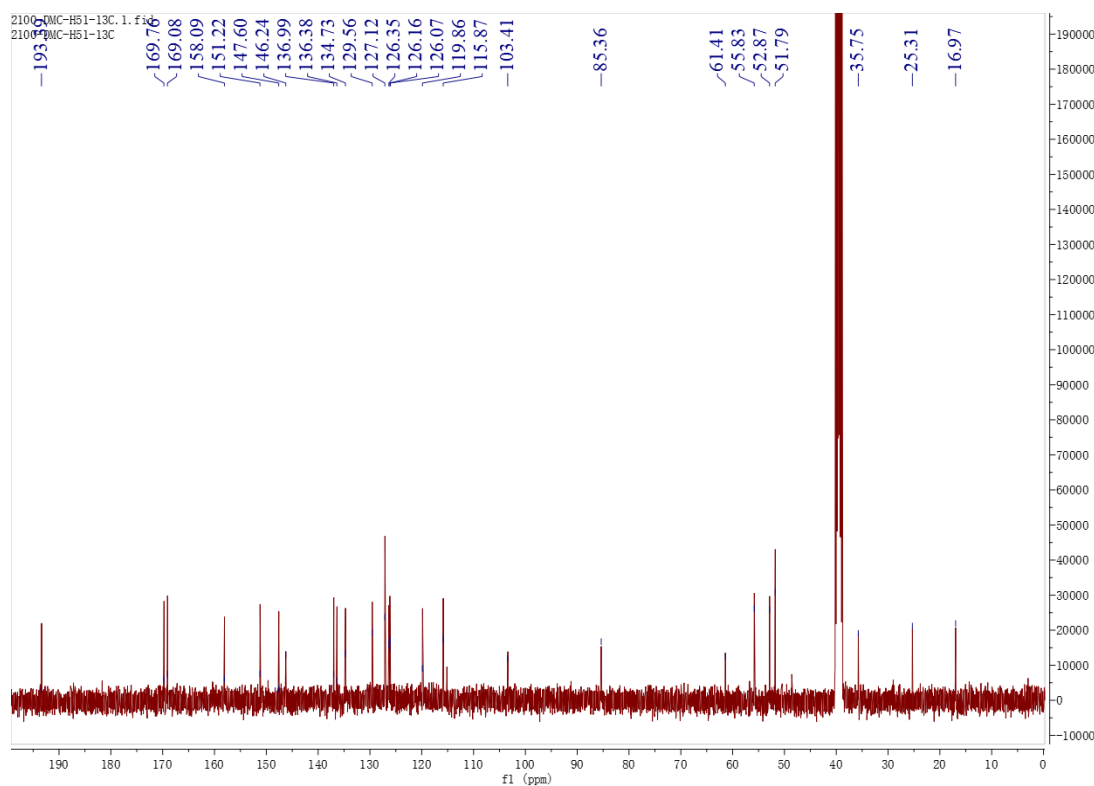

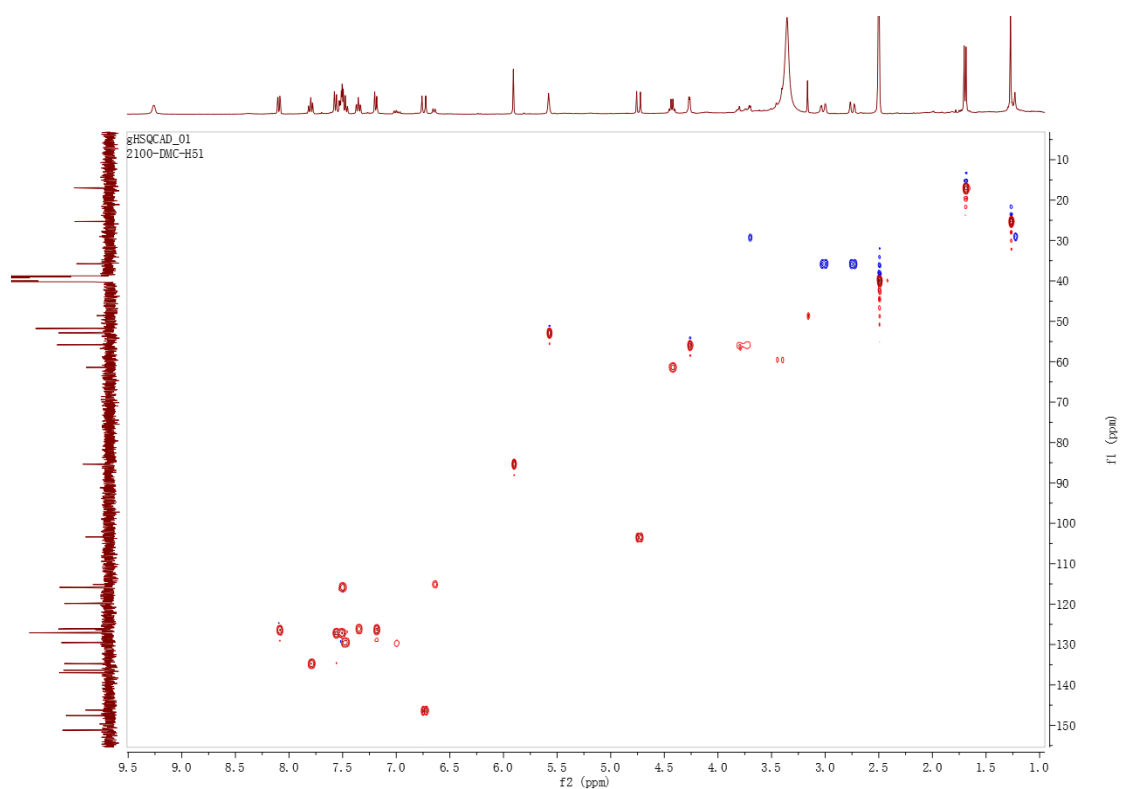

**Figure S3.** HSQC (DMSO- $d_6$ ) spectrum of **1**

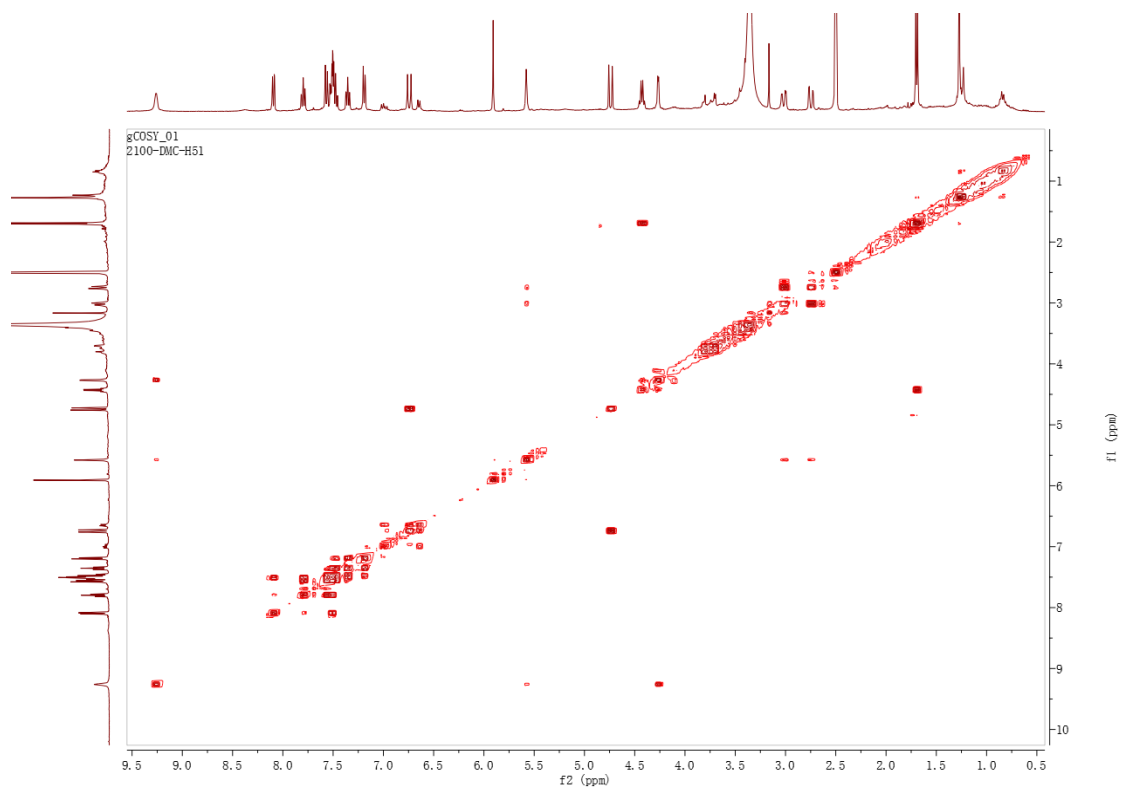

**Figure S4.**  $^1\text{H}$ - $^1\text{H}$  COSY (DMSO- $d_6$ ) spectrum of **1**

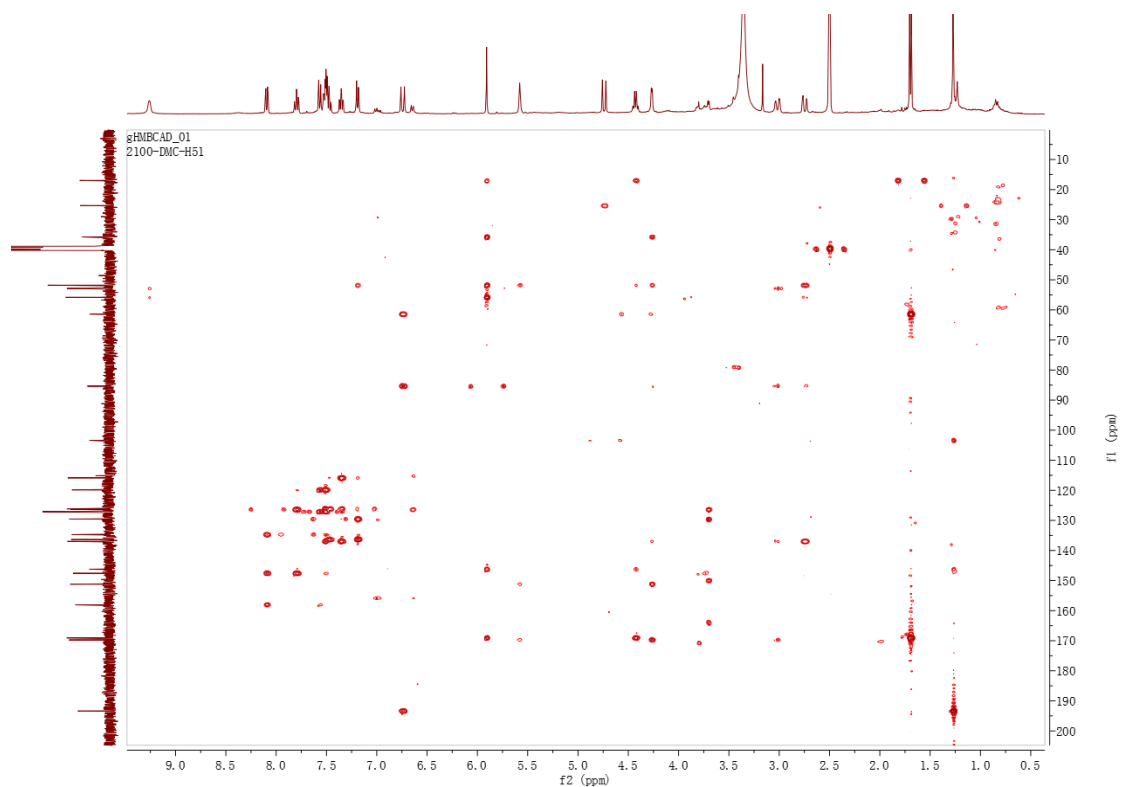

**Figure S5.** HMBC (DMSO- $d_6$ ) spectrum of **1**

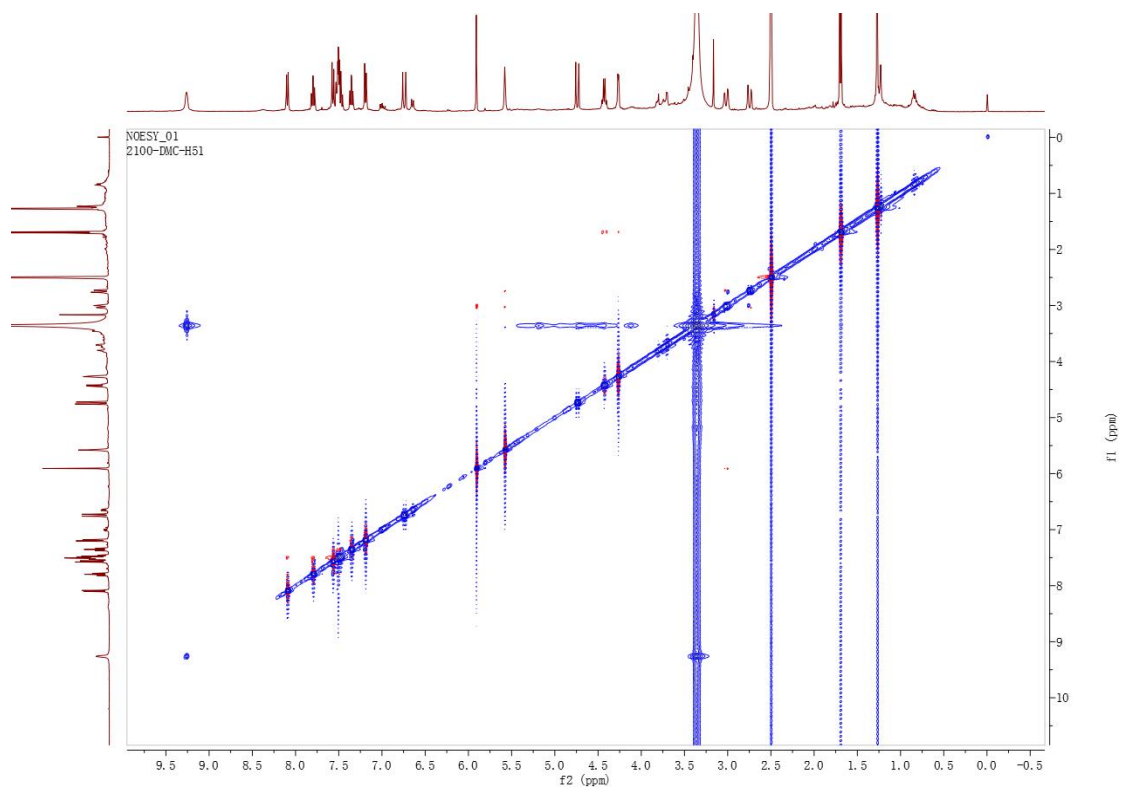

**Figure S6.** NOESY (DMSO- $d_6$ ) spectrum of **1**

20211004-DMC-H51\_211004113330 #96-97 RT: 0.81-0.81 AV: 2 SB: 30 0.38-0.62 NL: 2.61E6  
T: FTMS + p ESI Full ms [150.00-1000.00]

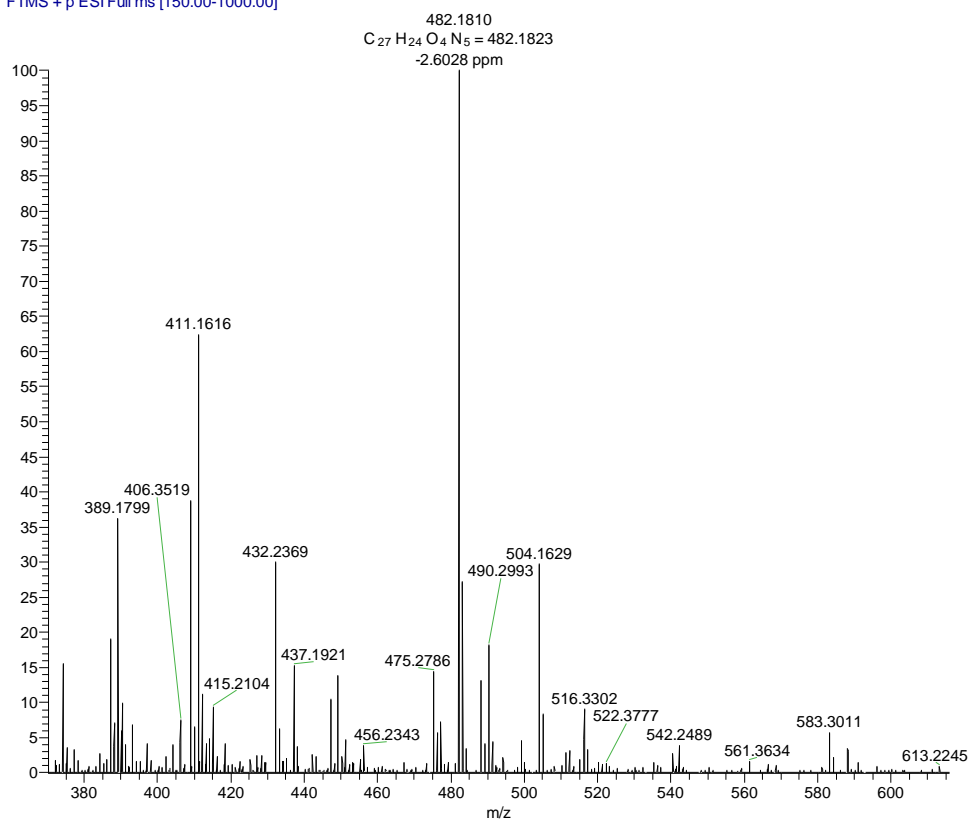

Figure S7. HRESIMS spectrum of **1**

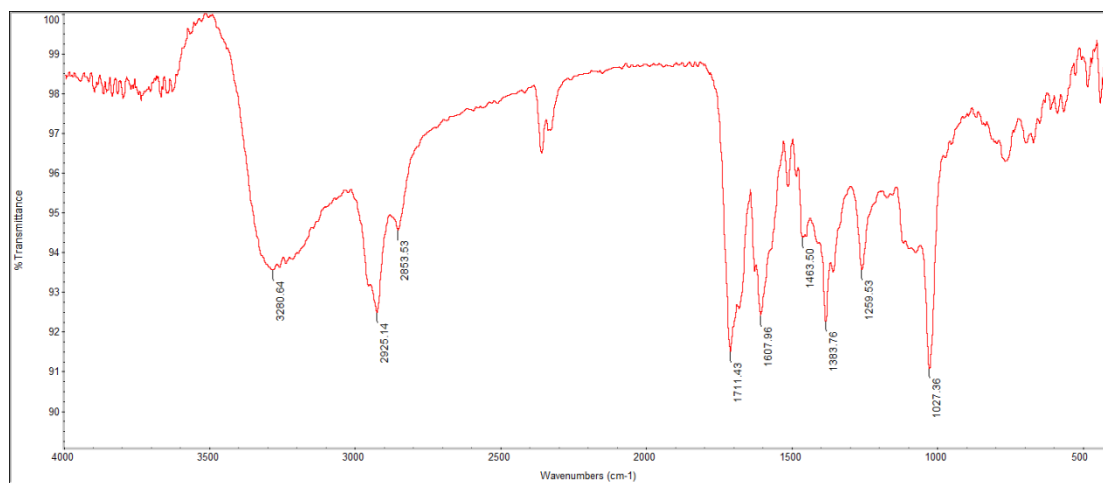

Figure S8. IR spectrum of **1**

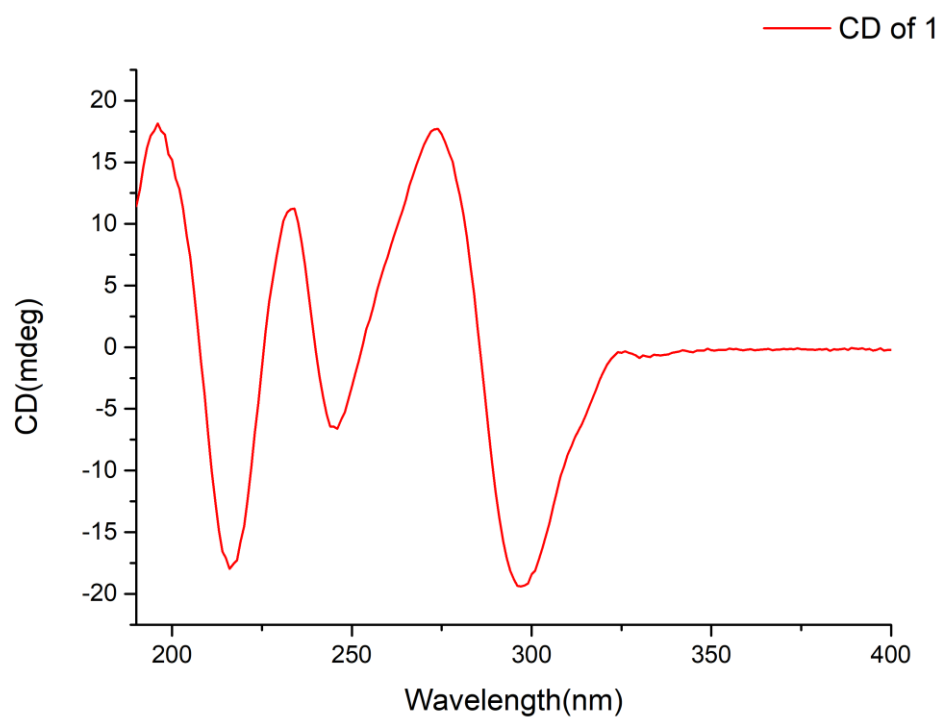

**Figure S9.** CD spectrum of **1**

**Table S1** The antibacterial activity results (only sections are shown)

| NO.               | MIC (μg/L)           |                        |                      |
|-------------------|----------------------|------------------------|----------------------|
|                   | <i>V. vulnificus</i> | <i>V. rotiferianus</i> | <i>V. campbellii</i> |
| 4                 | 6.25                 | -                      | -                    |
| 7                 | 12.5                 | 12.5                   | 6.25                 |
| ampicillin sodium | 6.25                 | 3.12                   | 3.12                 |

Note: ampicillin sodium as positive control

**Table S2** The anti-inflammatory activity against NO production induced by LPS (only sections are shown)

| IC <sub>50</sub> (μmol/L) |       |       |       |       |
|---------------------------|-------|-------|-------|-------|
| 2                         | 3     | 6     | 7     | Dex   |
| 66.15                     | 37.08 | 37.48 | 61.12 | 13.02 |

Note: Dex (dexamethasone) as positive control

**Table S3** The proliferation inhibitory activity against human tumor cell lines (only sections are shown)

|                         | Inhibition ratio (%) |       |         |       |        |
|-------------------------|----------------------|-------|---------|-------|--------|
|                         | PA-1                 | MCF7  | HCT 116 | A-375 | GBC-SD |
| 1 (10 μmol/L)           | 29.81                | 28.96 | 38.19   | 45.03 | 30.66  |
| Doxorubicin (10 μmol/L) | 98.72                | 62.33 | 63.74   | 90.06 | 53.49  |

Note: doxorubicin as positive control

**Table S4** Eleven culture media for small scale fermentation and their composition

| Medium | Medium composition                                                                                                                                                                                                                                                                                                                                                                                                       |
|--------|--------------------------------------------------------------------------------------------------------------------------------------------------------------------------------------------------------------------------------------------------------------------------------------------------------------------------------------------------------------------------------------------------------------------------|
| YES    | Sucrose 150 g/L, yeast extract 20 g/L, MgSO <sub>4</sub> ·7H <sub>2</sub> O 1 g/L, CuSO <sub>4</sub> 0.01 g/L, FeSO <sub>4</sub> 0.01 g/L, ZnSO <sub>4</sub> 0.01 g/L, sea salt 15 g/L.                                                                                                                                                                                                                                  |
| PDB    | Potato 200 g/L, glucose 20 g/L, sea salt 20 g/L.                                                                                                                                                                                                                                                                                                                                                                         |
| GPY    | Tryptone 10 g/L, yeast extract 10 g/L, glucose 20 g/L, sea salt 20 g/L.                                                                                                                                                                                                                                                                                                                                                  |
| Czapek | Sucrose 30 g/L, NaNO <sub>3</sub> 3 g/L, KH <sub>2</sub> PO <sub>4</sub> 1 g/L, MgSO <sub>4</sub> ·7H <sub>2</sub> O 0.5 g/L, KCl 0.5 g/L, FeSO <sub>4</sub> 0.01 g/L, sea salt 20 g/L.                                                                                                                                                                                                                                  |
| Starch | Starch 10 g/L, tryptone 1 g/L, sea salt 20 g/L.                                                                                                                                                                                                                                                                                                                                                                          |
| CYA    | Sucrose 30 g/L, yeast extract 10 g/L, NaNO <sub>3</sub> 1 g/L, MgSO <sub>4</sub> 0.5 g/L, KCl 0.5 g/L, KH <sub>2</sub> PO <sub>4</sub> 1 g/L, FeSO <sub>4</sub> 0.01 g/L, sea salt 20 g/L.                                                                                                                                                                                                                               |
| TBI    | Sucrose 30 g/L, KH <sub>2</sub> PO <sub>4</sub> 1 g/L, L-arginine 0.871 g/L, MgSO <sub>4</sub> 0.5 g/L, KCl 0.5 g/L, FeSO <sub>4</sub> 0.01 g/L, sea salt 20 g/L.                                                                                                                                                                                                                                                        |
| GMM    | Glucose 10 g/L, 20 × salt solutions 50 mL/L, trace element 1 mL/L. 20 × salt solutions: NaNO <sub>3</sub> 120 g/L, KCl 10.4 g/L, MgSO <sub>4</sub> ·7H <sub>2</sub> O 10.4 g/L, KH <sub>2</sub> PO <sub>4</sub> 30.4 g/L. trace element: ZnSO <sub>4</sub> ·7H <sub>2</sub> O 2 g/L, H <sub>3</sub> PO <sub>4</sub> 1.1 g/L, MnCl <sub>2</sub> ·4H <sub>2</sub> O 0.5 g/L, FeSO <sub>4</sub> ·7H <sub>2</sub> O 0.5 g/L, |



|                            |                                                                                                                                                                                                              |
|----------------------------|--------------------------------------------------------------------------------------------------------------------------------------------------------------------------------------------------------------|
|                            | CoCl <sub>2</sub> ·5H <sub>2</sub> O 0.16 g/L, CuSO <sub>4</sub> ·5H <sub>2</sub> O 0.16 g/L, (NH <sub>4</sub> ) <sub>6</sub> Mo <sub>7</sub> O <sub>24</sub> 0.11 g/L, Na <sub>4</sub> EDTA 5 g/L.          |
| MEB                        | Malt extract 17.0 g/L, tryptone 3.0 g/L, PH 5.4 ± 0.2, sea salt 20 g/L.                                                                                                                                      |
| Czapek+1%<br>tryptone      | Sucrose 30 g/L, NaNO <sub>3</sub> 3 g/L, KH <sub>2</sub> PO <sub>4</sub> 1g/L, MgSO <sub>4</sub> ·7H <sub>2</sub> O 0.5 g/L, KCl 0.5 g/L, FeSO <sub>4</sub> 0.01 g/L, tryptone 10 g/L, sea salt 20 g/L.      |
| Czapek+1%<br>yeast extract | Sucrose 30 g/L, NaNO <sub>3</sub> 3 g/L, KH <sub>2</sub> PO <sub>4</sub> 1g/L, MgSO <sub>4</sub> ·7H <sub>2</sub> O 0.5 g/L, KCl 0.5 g/L, FeSO <sub>4</sub> 0.01 g/L, yeast extract 10 g/L, sea salt 20 g/L. |

**Table S5** Three culture media for lab scale fermentation and their composition

| Medium                    | Medium composition (bottle)                                                                                                                                                                                              |
|---------------------------|--------------------------------------------------------------------------------------------------------------------------------------------------------------------------------------------------------------------------|
| Rice mixed GPY medium     | Rice 80 g, yeast extract 0.8 g, tryptone 0.8 g, glucose 1.6 g, sea salt 4 g, water 80 mL.                                                                                                                                |
| Wheat mixed Czapek medium | Wheat 20 g, rice 60 g, sucrose 1.8 g, NaNO <sub>3</sub> 0.18 g, KH <sub>2</sub> PO <sub>4</sub> 0.06g, MgSO <sub>4</sub> ·7H <sub>2</sub> O 0.03 g, KCl 0.03 g, FeSO <sub>4</sub> 0.0006 g, sea salt 1.2 g, water 60 mL. |
| GPY medium                | Tryptone 2 g, yeast extract 2 g, glucose 4 g, sea salt 40 g, water 200 mL.                                                                                                                                               |

#### The rDNA-ITS sequence of the fungal strain *Metarhizium* sp. P2100

The rDNA-ITS sequence of P2100 (5'→3'):

AACCCATGTGAACTTATACCTTTTACTGTTGCTTCGGCGGGATCGCCCCGGGAAACAGGTT  
CGCGAGAGCCCCGGCCCCCGGAACCAAGGCGCCCGCGGTGGGATTTACAGAACTCTTGTATGT  
TTTTTTCACGTCTGAGTGGATCATATATCAATGAATCAAACTTTCAACAACGGATCTCTTGGT  
TCTGGCATCGATGAAGAACGCAGCGAAATGCGATAAGTAATGTGAATTGCAGAATTCAGTGAA  
TCATCGAATCTTTGAACGCACATTGCGCCCGCCAGTATTCTGGCGGGCATGCCTGTTGAGCGTC  
ATTTCAACCCTCAAGCCCCGAGCGGCTTGGTGTGGGGCCGGCAATAGTGCCTCGCGTTGTAT  
GATGCGAGCGCGCGCCCGCCCCGAAATGAATTGGCGGTCTCGTCGCGGCCTCCTCTGCGTAGTA  
GCATAAACCTCGCAACGGGAGCGCGGCGCGGCCACTGCCGTCAAACGCCCAACTTTTTCTCAA  
GAGT
